# Supplementary material
Source: PubMed Central journal article supplement (PMC3964131)
Supplement: 1315923111_pnas.201315923SI.pdf [file 1315923111_pnas.201315923SI.pdf]

# Supporting Information

Hariadi et al. 10.1073/pnas.1315923111

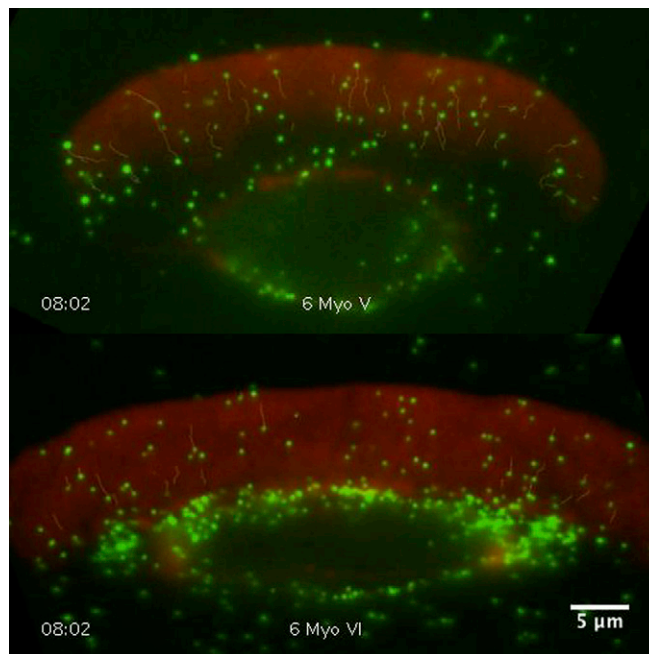

**Movie S1.** (Upper) Movie of scaffolds with 6 myosin V (green) meandering on a keratocyte actin network (red) (Fig. 3C). (Lower) Scaffolds with 6 myosin VI (green) moving linearly on the 2D network (Fig. 3D). Data were acquired at a 2-Hz frame rate, 2 mM ATP, and at room temperature.

[Movie S1](#)

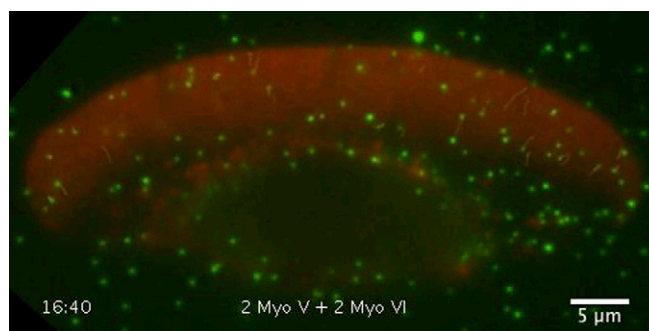

**Movie S2.** Scaffolds with 2 myosin V and 2 myosin VI meandering on a keratocyte actin network (red) (Fig. 6A). Scaffolds travel unidirectionally, either toward the cell periphery or the cell center. Data collected at a 2-Hz frame rate, 2 mM ATP, and at room temperature.

[Movie S2](#)
