# Supplementary material
Source: PubMed Central journal article supplement (PMC3964131)
Supplement: 1315923111_sapp.pdf [file 1315923111_sapp.pdf]

# Supporting Information for

**Title: Myosin lever arm directs collective motion on cellular actin network**

**Author affiliation:**

Rizal F. Hariadi<sup>a</sup>, Mario Cale<sup>b</sup>, and Sivaraj Sivaramakrishnan<sup>a,b,c</sup>

<sup>a</sup>Department of Cell and Developmental Biology,

<sup>b</sup>Department of Biohysics,

<sup>c</sup>Department of Biomedical Engineering,

University of Michigan, Ann Arbor, Michigan 48109, USA

**Corresponding author**

Sivaraj Sivaramakrishnan  
3045 BSRB,  
109 Zina Pitcher Place,  
Ann Arbor, MI 48109-2200, USA  
Ph: 734-764-2493  
Fax: 734-763-1166  
*e-mail:* [sivaraj@umich.edu](mailto:sivaraj@umich.edu)

**This PDF file includes**

Supplemental Methods  
Supplemental Figures S1–S14  
Legends for Supplemental Movies S1–S2  
Supplemental Notes S1  
Supplemental Table S1

## Supplemental Methods

*Buffer and reagents* – 1X Assay Buffer (AB) - 25 mM imidazole (pH 7.5), 4 mM MgCl<sub>2</sub>, 1 mM EGTA, 25 mM KCl, 10 mM DTT; 1X AB.BSA buffer, AB buffer + 1 mg/mL BSA.

*Preparation of benzyl-guanine-conjugated oligo* – C6-amine modified oligonucleotides (oligo) were covalently linked to benzyl-guanine NHS-ester (BG-GLA-NHS; NEB). Briefly, 0.08 mM oligo was incubated with 3.2 mM BG-GLA-NHS in 0.1M NaBO<sub>3</sub> for ~8 hr at room temperature with shaking. Oligo was precipitated in a final concentration of 70% ice-cold ethanol followed by multiple washes and centrifugation (12,000g; 30 min) steps to remove unreacted BG-GLA-NHS. Air-dried pellet was reconstituted in 2 mM Tris pH 8.5 followed by desalting (2x) on G-50 MicroColumns (GE Healthcare). Final benzyl-guanine labeled oligo (BG-oligo) concentration was determined from UV absorbance at 260 nm (Nanodrop). BG oligo aliquots were frozen and stored at -80 °C.

*Covalent oligo attachment to myosin protein* – Myosin protein bound to Anti-FLAG resin was incubated with excess (>10 μM) of benzyl-guanine-conjugated oligo (BG-oligo) at 37 °C with shaking for 30 min followed by overnight incubation on ice. Resin was washed 3 times with buffer containing 20 mM Imidazole pH 7.4, 3 mM DTT, 1 μg/ml PMSF, 10 μg/ml aprotinin, and 10 μg/ml leupeptin. BG-oligo labeled myosin was eluted with 0.2 mg/ml FLAG-peptide (Sigma) and was used within two weeks or stored in a 55% v/v glycerol solution at -20 °C. Labeling efficiency was assessed by separating labeled and unlabeled myosin by 10% SDS-PAGE followed by staining with SimplyBlue SafeStain (Invitrogen). Myosin labeled with BG-oligo showed a distinct gel-shift with over 95% labeling efficiency quantified by densitometry.

*Origami preparation and purification* – DNA sequences are listed in the SI Notes 1. Three strands are used in tandem to enable purification of scaffold-myosin complexes by strand displacement (Fig. S5). The origami-attachment strand is an extended staple strand; the spacer strand has complementarity to the origami-attachment strand; the biotin-strand has complementarity to the spacer strand. Further, staple strands at the sites of myosin attachment have a 5T's extension to provide the bound myosin with rotational freedom. Last, the 23 edge- staple strands were extended with a unique DNA sequence. A single Cy3 DNA strand with complementarity to this edge-staple extension was used to label each scaffold with 23 Cy3 dye molecules. Purified scaffolds were stored at 4 °C.

*Scaffold-myosin purification* – Affinity purification was achieved with a nitrocellulose coverslip coated with neutravidin. Biotinylated, myosin-scaffold mixtures were bound to the coverslip for 5 min. Subsequently, the coverslips were extensively washed with AB supplemented with 0.1 mg/ml BSA. Myosin scaffolds were eluted with AB.BSA and 9 μM calmodulin. Elution was achieved by competitive displacement of the spacer strand with a highly complementary elution strand (10 min at RT; Fig. S5). Purified myosin-scaffold complexes were immediately used in motility assays. The yield and integrity of scaffold- myosin conjugation was assessed using 1% agarose - 0.1% SDS gels.

*SDS-Agarose Gel* – The purity, yield, and structural integrity of myosin-origami conjugation was assessed by a gel-shift assay. The myosin-origami samples were incubated with loading dye (Promega) containing 1% SDS for 5 minutes. The samples were loaded onto 1% agarose-0.1% SDS gel and run in 1X TE, 0.1% SDS, and 5 mM MgCl<sub>2</sub> for 6-10 hours, at 60 V, at room temperature.

*Cy3-myosin conjugation for single molecule experiments* – Purified BG-oligo1-labeled myosin dimers were mixed with an excess of Cy3-RC-oligo1-Cy3 strand (5'- Cy3-ACTATAGAGATTGGCGCGTATCGT-Cy3 -3') and incubated in binding buffer (10 mM Imidazole, pH 7.4, 25 mM KCl, 10 mM MgCl<sub>2</sub>) supplemented with 1 mg/mL BSA and 9 μM calmodulin for 20 minutes at ambient temperature (RC refers to the reverse complement). Cy3-labeled myosin was purified from the excess of Cy3-RColigo1-Cy3 by Nickel-NTA agarose resin (Qiagen). First, the labeled myosin was bound to the resin for 30 minutes on ice. Resin was extensively washed with assay buffer containing 1 mg/mL BSA to remove unbound Cy3-RColigo1-Cy3 strands. The purified Cy3-labeled myosin was eluted from the resin by buffer consisting of 200 mM Imidazole, pH 7.4, 1 mM EGTA, 4 mM MgCl<sub>2</sub>, 25 mM KCl, 9.0 μM calmodulin, 10 μg/mL Aprotinin, 10 μg/mL Leupeptin, 0.1 mg/mL PMSF, and 10 mM DTT. Potential aggregates were removed by centrifugation for 15 minutes at  $21.2 \times 10^3$  g on a bench top centrifuge at 4°C.

*Preparation of keratocyte actin networks* – Keratocytes were derived from scales of *Thorichthys meeki* (Firemouth Cichlids) as previously described (26). All protocols conform to the guidelines of the local animal care and use committee (IACUC). As previously reported (26), keratocytes were detergent-extracted and actin networks were stabilized with phalloidin [50 nM Alexa-488 phalloidin (Invitrogen) with 200 nM unlabeled phalloidin (Sigma)]. Coverslips with detergent extracted keratocytes were stored at 4°C and used in motility experiments within 24 hrs.

*Single molecule imaging* – Single molecule motility assays were acquired at 240x magnification on an objective-based TIRF microscope (Olympus IX81) with a 60x NA 1.48 Apo TIRF objective (Olympus), 4x image magnifier, EMCCD iXON Ultra, and a 561 nm laser (Coherent, 50 mW max power, 6 mW near objective). Movies of scaffold motility on the keratocyte actin network were obtained at 2 Hz for >20 minutes.

*Scaffold-myosin imaging* – Motility assays of Cy3-labeled scaffold with myosin motors were imaged at 150x magnification on a Nikon TiE microscope equipped with a 100x 1.4 NA Plan-Apo oil-immersion objective, 1.5x magnifier, a mercury arc lamp, Evolve EM-CCD camera (512 pixel x 512 pixel; Photometrics) and Nikon NIS-Elements software. Movies of myosin-scaffold motility on keratocyte were acquired at 2 Hz for 10–60 minutes per field of view.

*Run length and end-to-end speed* – Analysis of myosin labeled scaffold movement was restricted to scaffolds that appeared for more than 6 continuous frames (3 sec) and covered a distance of more than 3 pixels (320 nm). Scaffolds that were temporarily stalled were excluded from the run length analysis. Run lengths were measured by fitting a trajectory into linear segments of 300 nm starting with the first appearance of the

scaffold. Run-length distribution was fitted to the truncated cumulative distributive function (CDF) of a single exponential distribution,  $CDF(x) = 1 - e^{-(x-x_{min})/\lambda}$ , where  $\lambda$  is the mean run length and  $x_{min}$  is the *a priori* minimum measurable run length (600 nm). End- to-end speeds were calculated by dividing measured run length (see above) by the total time the scaffold remained bound to the keratocyte network. The run length is reported as mean $\pm$ SEM of the parameter  $\lambda$ , derived from the fit. The SEM was estimated by the bootstrap method.

*Stochastic simulation* – Detailed description of the simulation is presented in Fig. S11.

*Atomic Force Microscopy imaging* – AFM images were acquired using tapping mode on a Nanoscope IIIa (Bruker Corporation). We used a SNL silicon nitride cantilever (Bruker AFM Probes) of length 110  $\mu$ m and spring constant 0.38 N/m. Samples were imaged in AB with excess myosin and BSA removed by purification with Streptavidin magnetic beads (NEB; S1420S). Briefly, 10  $\mu$ L of purified sample was deposited on a freshly cleaved piece of mica (Ted Pella),  $\sim 1$  cm  $\times$  1 cm in size, affixed to a 15-mm diameter magnetic stainless steel puck (Ted Pella). After the DNA scaffolds are immobilized on the mica, an additional 20  $\mu$ L of AB was added to both sample and cantilever holder before imaging.

*Statistical analysis* –The p values were computed by two-tail unpaired Student's t test using Prism 6 data analysis software (GraphPad). All reported measurements are expressed as mean  $\pm$  standard error of mean (SEM). The bootstrap method was used to estimate the uncertainty (SEM) of a measurement of X from the full data set. Bootstrap method was used to analyze shape factor (*S*; Figs. 1, 3, 4, 5, 6), normalized photon intensity (*I*; Fig. 2), speed (*v*; Figs. 3A and S8), run length (*RL*; Figs. 3B and S9). The analysis was performed with either MATLAB or Mathematica. First, from the full data set of sample size *N*, a subset of size  $\lfloor N/2 \rfloor$  was randomly chosen to compute  $x_j$ . The brackets denote rounding off to the nearest integer. In a random subset, an element was never chosen more than once. The value of  $x_j$  was generated  $\geq 1000$  times. As *j* increases, the distribution of  $x_j$  approaches a normal distribution  $\langle x_j \rangle \rightarrow X$ . Finally, the standard deviation of  $x_j$  was used as an estimate of the uncertainty in the measurement of X.

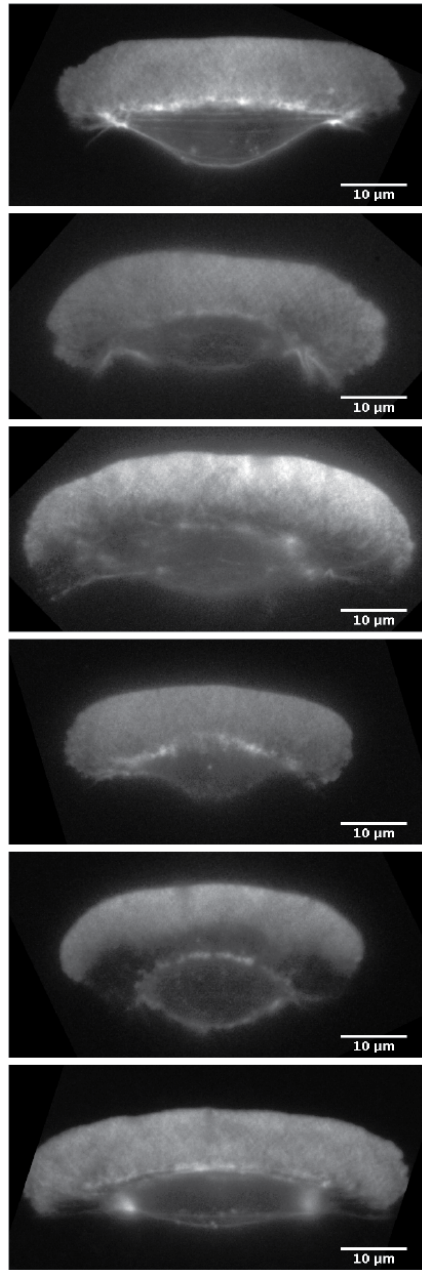

**Figure S1 – Sample keratocyte actin networks** - Representative fluorescence images of fish epidermal keratocyte networks after detergent extraction. The actin networks were stabilized with a combination of Alexa488-phalloidin and dark-phalloidin (1:4) during the extraction.

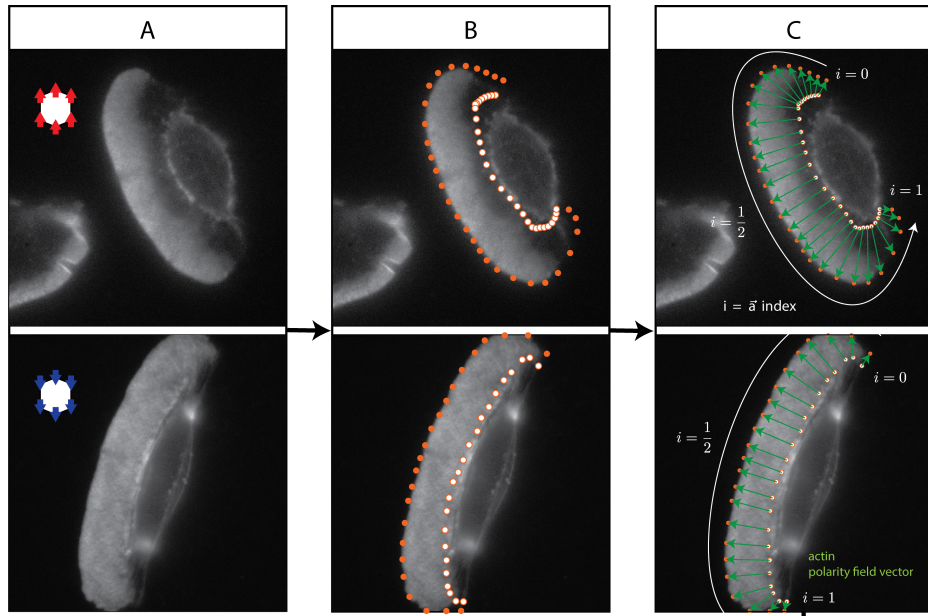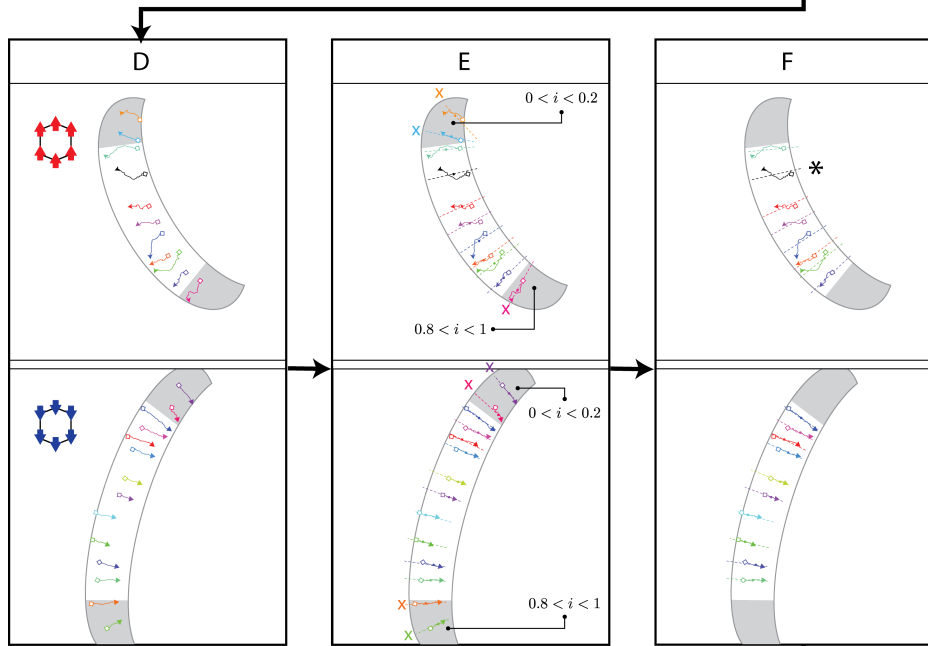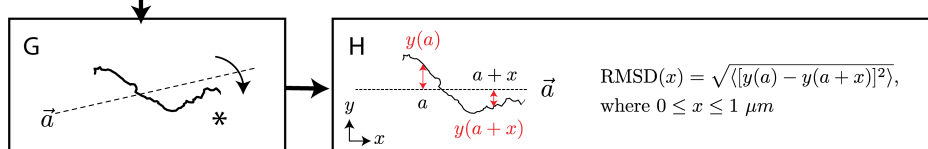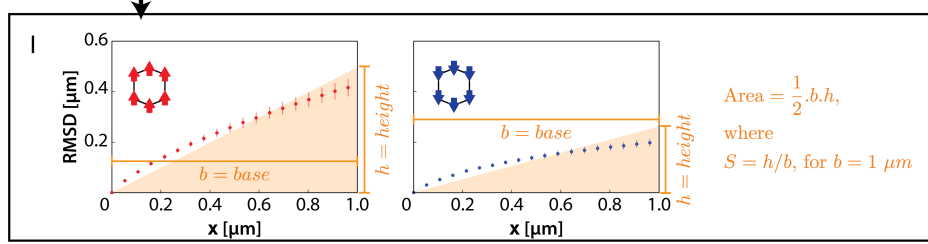

**Figure S2 (previous page) – Procedure for calculating the shape factor for a set of trajectories**

(A-F) Analysis of selected trajectories for scaffolds with either 6 myosin VI (top half) or scaffolds with 6 myosin V (bottom half). These steps were used for computing the shape factor for both experimental and simulated trajectories in Figs. 1, 3, 4, 5, and 6.

- (A) Keratocyte image.
- (B) Selected coordinates of  $\geq 20$  equidistant points near the cell center (open orange circles) and at the cell periphery (closed orange circles).
- (C) Vectors connecting points from the cell center to the cell periphery (green arrows) were used to generate a set of actin polarity field vectors across the actin surface. Each vector was given an index  $0 \leq i \leq 1$ , based on its starting position.
- (D) Trajectory coordinates are loaded on to the actin polarity field vector map.
- (E) Center of mass  $\{x_{CM}, y_{CM}\}$  of each trajectory is calculated as
$$x_{CM} = \frac{1}{N} \sum_j^N x_j \text{ and } y_{CM} = \frac{1}{N} \sum_j^N y_j$$
where  $N$  is the number of points in a trajectory. A binary search algorithm was used to find an actin polarity field vector (dashed arrows) that passes through  $\{x_{CM}, y_{CM}\}$ .
- (F) Trajectories with index  $0 \leq i \leq 0.2$  and  $0.8 \leq i \leq 1.0$  were excluded from the data analysis in order to avoid complications due to the possible variation in actin architecture at the keratocyte edges.
- (G) The trajectories in (F) were rotated to align their local actin polarity field vector to a horizontal axis ( $x$ ). As an example, the \* trajectory in (F) was rotated clockwise (B). The rotated \* trajectory is presented in (H). At this step, aligned trajectories from multiple keratocytes can be combined into a single data set. Examples of ensembles of aligned trajectories are presented in Figs. 1D–E, 3E–F, 5C–D, and 6B–C.
- (H) Root mean squared displacement (RMSD) was calculated relative to the axis of the local actin polarity field vector ( $\vec{a}$ ). RMSD is defined as
$$RMSD(x) = \sqrt{\langle [y(a) - y(a+x)]^2 \rangle}, \text{ where } 0 \leq x \leq 1 \text{ } \mu\text{m}.$$
- (I) The  $RMSD(x)$  was fit to a polynomial of order  $n$  ( $x^n$ ). The area under this curve was calculated by integrating the fitted polynomial from 0–1  $\mu\text{m}$ . The height of a triangle with the same area and a base of 1  $\mu\text{m}$  is defined as the shape factor. Mathematically, the shape factor ( $S$ ) is expressed as
$$A = \frac{1}{2} \cdot b \cdot h$$
where  $A$  = area of the shaded triangle,  $b$  = base, and  $h$  = height. Then,  $S = h/b$ , for  $b = 1 \text{ } \mu\text{m}$ .

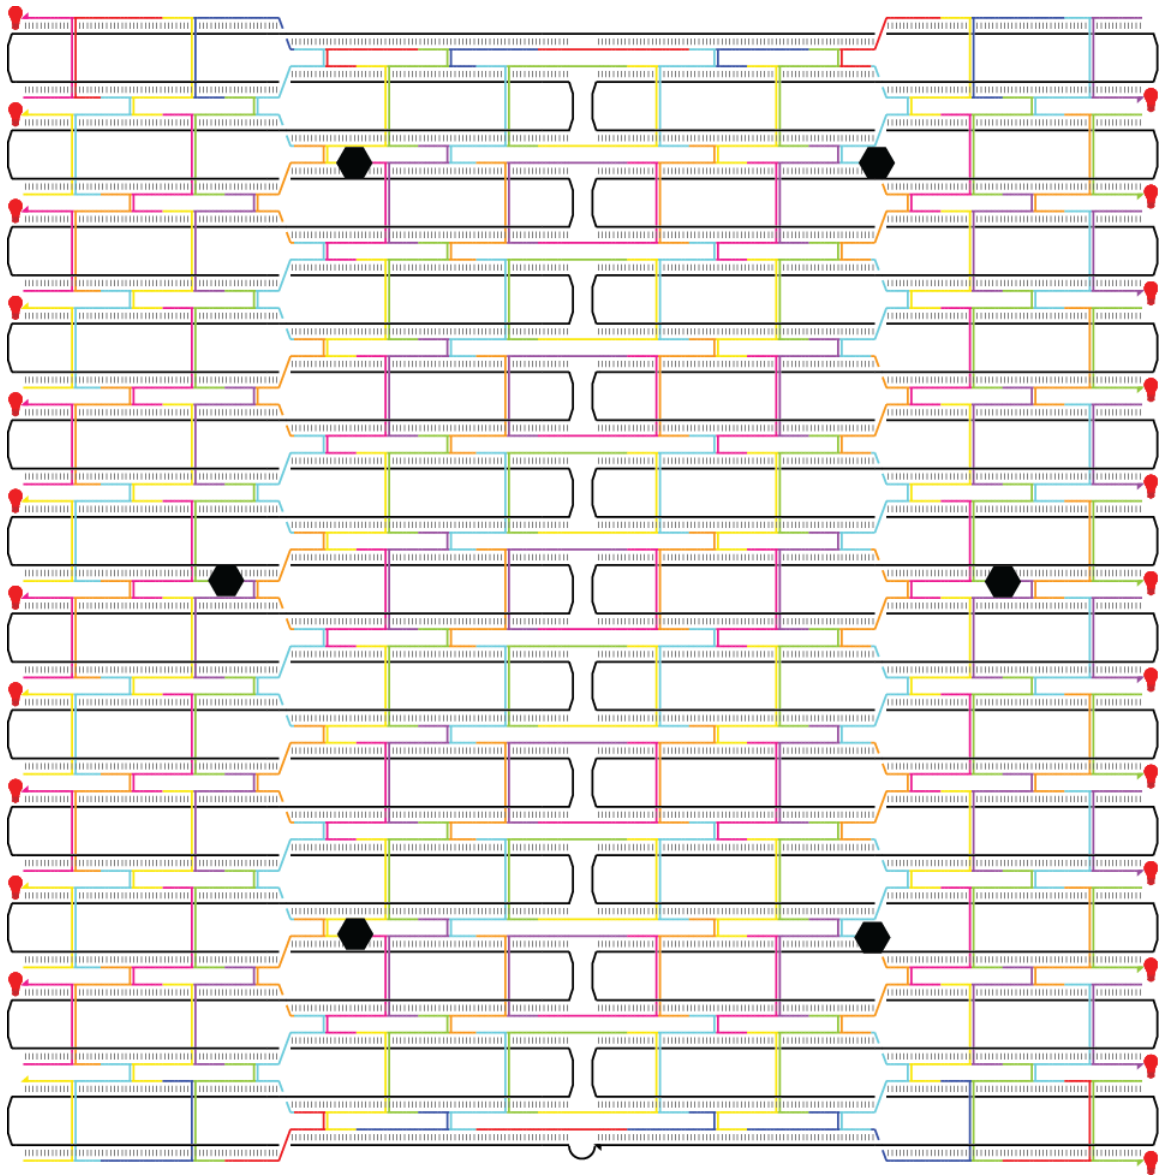

**Figure S3 – Flat rectangular DNA origami scaffold design** – The main core of the scaffold is a flat rectangular DNA origami with 10.44 bp/turn, consisting of 24 parallel DNA helices (*Woo and Rothemund, Nat. Chem, 2011*). The scaffold strand is shown as a continuous thick black line. The 6 possible attachment sites for DNA-labeled myosin V or VI are depicted as black hexagons. The bottom left staple strand is extended for affinity-based purification (Fig. S5). With the exception of the edge-staple strand at the bottom left corner, each staple strand is labeled with 23 Cy3 fluorophores (shown as red light bulbs) to facilitate single molecule microscopy and myosin occupancy assays.



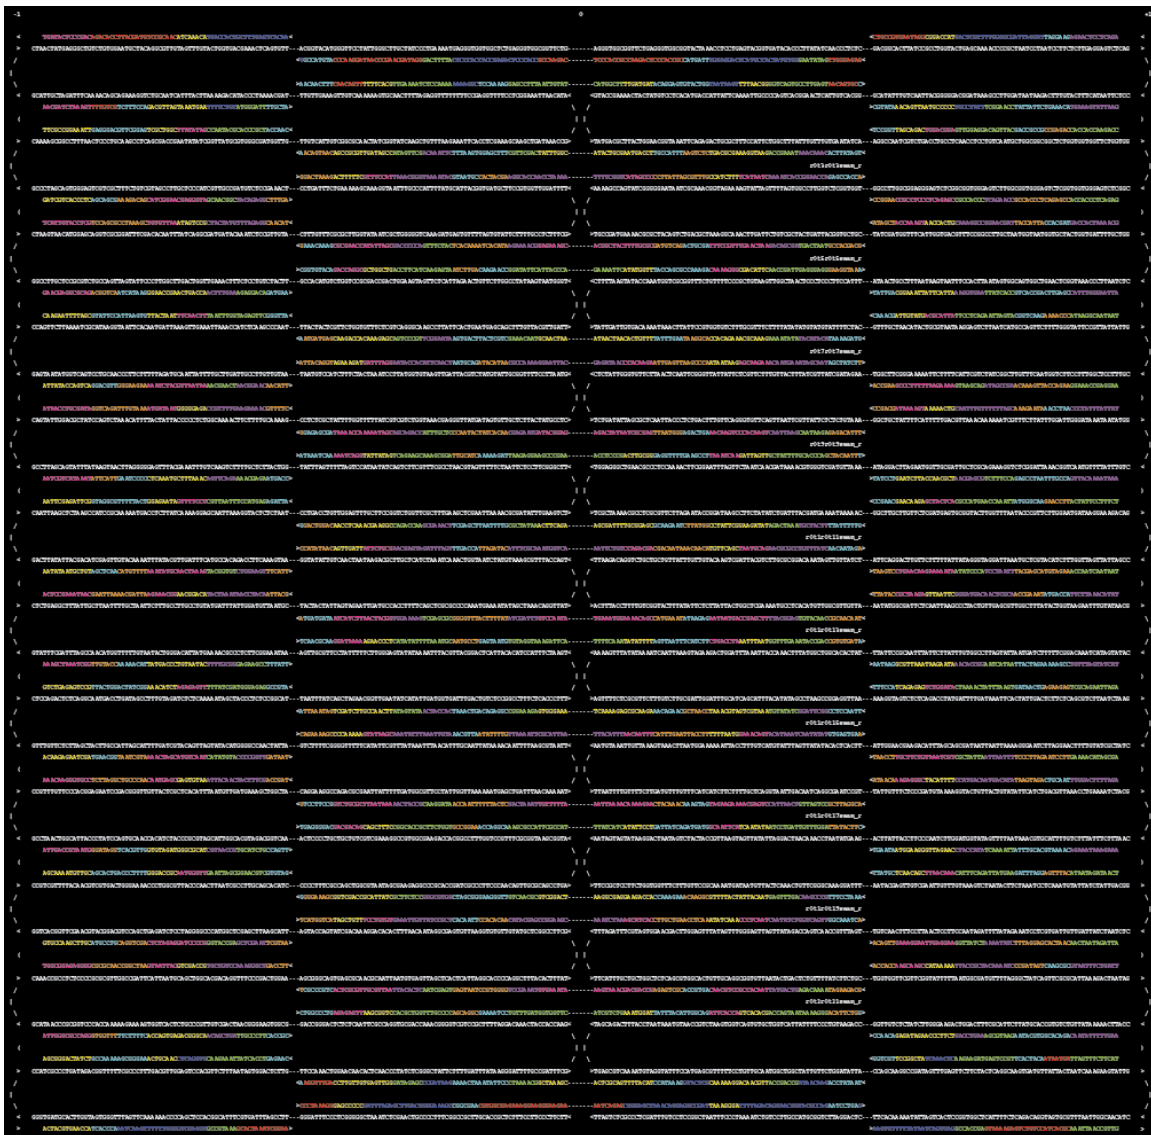

**Figure S4 - Sequence diagram for a flat rectangular DNA origami scaffold with 10.44 bp/turn (Woo and Rothmund, *Nat. Chem.*, 2011) – The scaffold strand is displayed in white.**

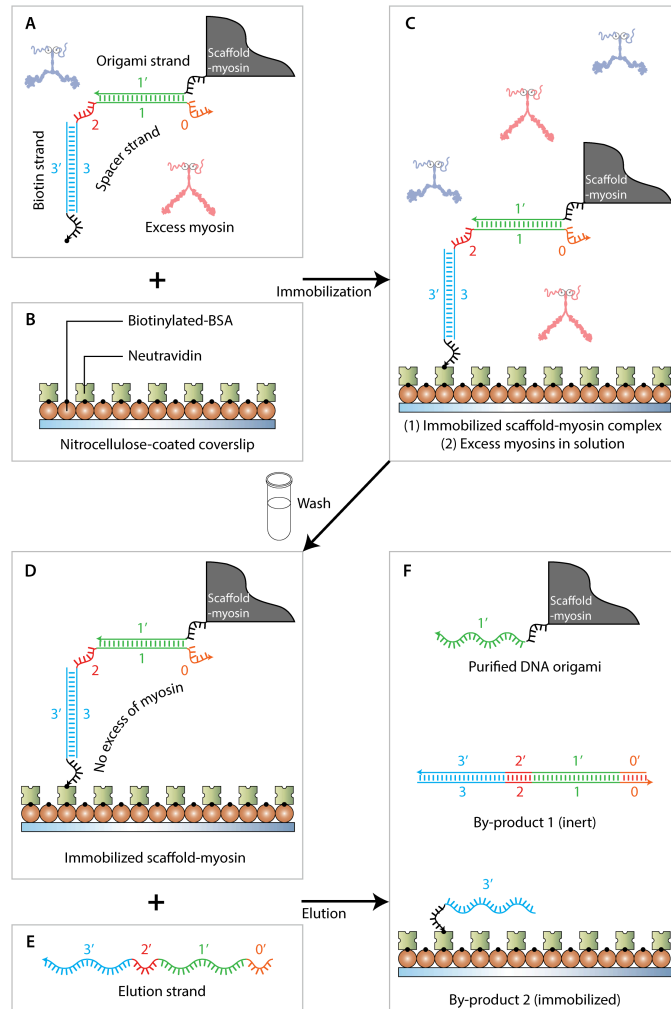

**Figure S5 – Purification steps to remove the excess myosin** – (A) Each scaffold is agarose-purified to remove excess staple strands. The agarose-purified scaffold (gray) contains three short oligos for further purification of scaffold-myosin complexes, namely an origami strand (1'; green), a biotin strand (3'; blue), and a spacer strand (123; green-red-blue). (B,C) The origami-myosin complexes are immobilized on a neutravidin-coated surface (22x22 mm coverslip) by a BSA-biotin-neutravidin linkage. The unconjugated myosins are free in solution. (D) The excess myosin is washed away by a gentle immersion step in a 50 mL Falcon tube filled with AB (see SI Methods) and 0.1 mg/mL BSA. (E) An elution strand (0'1'2'3'; orange-green-red-blue) is presented to the immobilized scaffold-myosin complex. (F) The elution strand releases the scaffold-myosin complex into solution by a branch migration reaction, while releasing the inert elution-spacer complex as a by-product. Purified myosin-scaffold complexes are immediately used in motility assays.

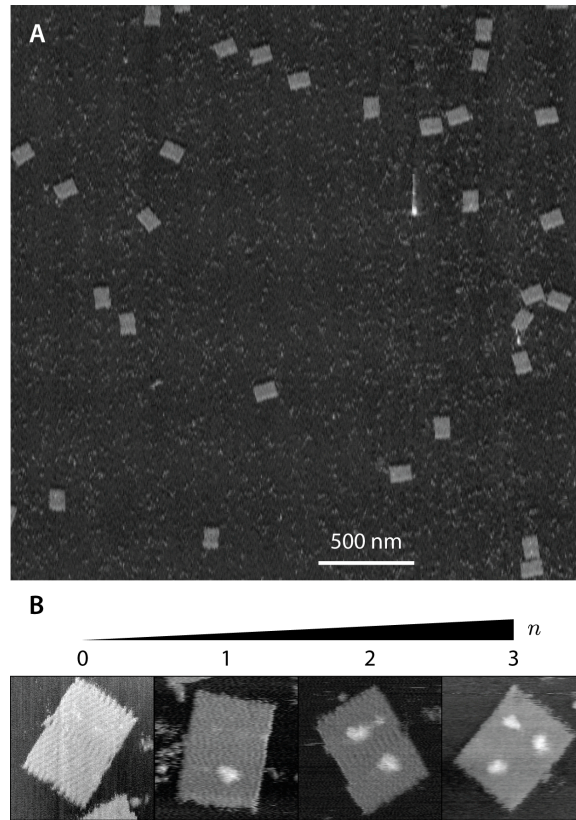

**Figure S6 – AFM images of purified DNA scaffolds – (A)** Representative AFM image of purified DNA scaffolds showing the structural integrity (> 95%) after the purification step (Fig. S5). **(B)** High resolution AFM images of DNA scaffolds with  $n = 0, 1, 2,$  and  $3$  myosin V motors. The size of the DNA scaffold is  $\sim 100$  nm x  $80$  nm.

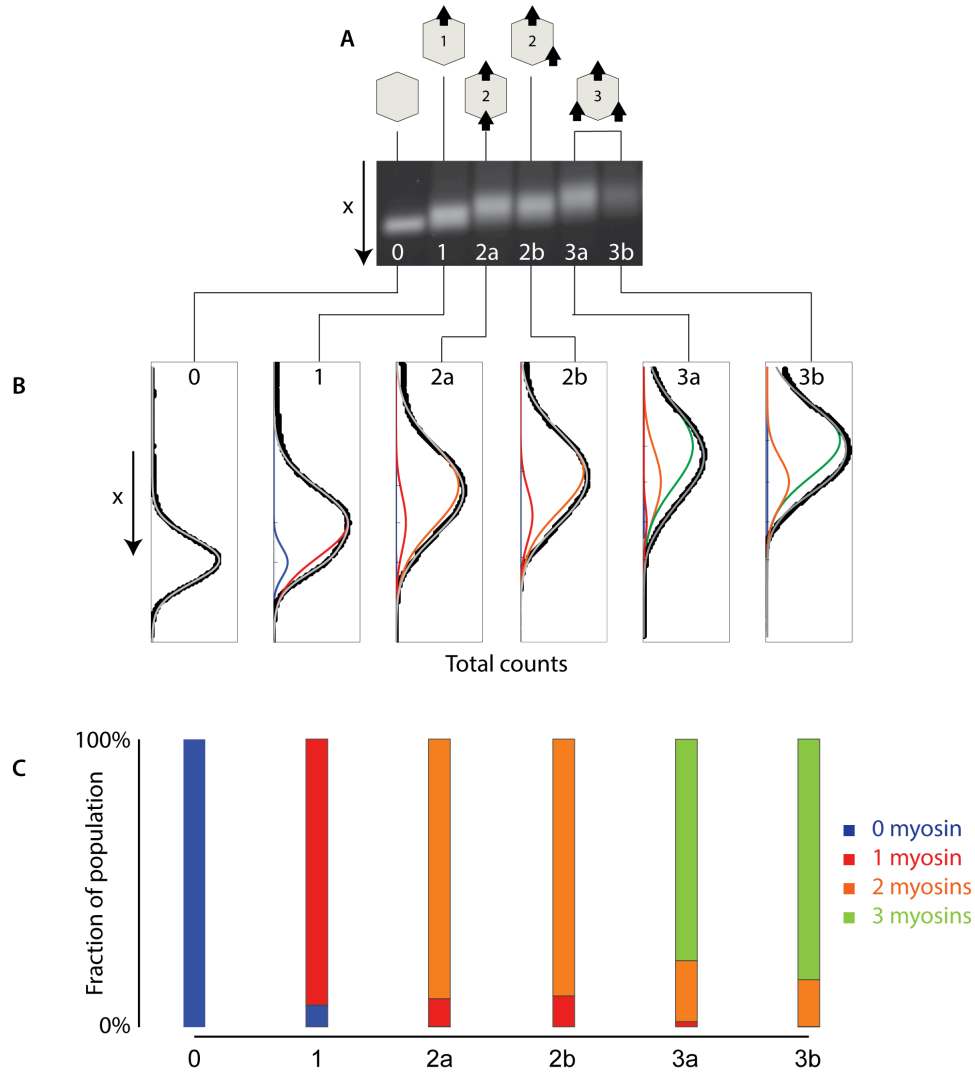

**Figure S7 – Quantifying myosin occupancy based on agarose gel shift –** (A) SDS-agarose gel shift of Cy3-labeled scaffolds with 0, 1, 2, and 3 DNA binding strands in the presence of DNA-myosin complexes. The gel is a duplicate image of Fig. 2D of main text. (B) Myosin occupancy was estimated by fitting the intensity profile of each band along the electrophoresis direction (black dots). The intensity profile for each condition is derived from a summation of profiles for distinct myosin occupancies, each of which is assumed to be Gaussian distributed. Thus the intensity profile in each lane is the sum of Gaussians corresponding to 0 (blue), 1 (red), 2 (orange) and, 3 (green) myosins each of which has a distinct mean location along the gel, amplitude, and standard deviation. The observed intensity profiles were iteratively fit to the sum of Gaussians. The fraction of population of scaffolds with  $n$  myosin was calculated from the area under corresponding Gaussian curve. In our analysis, we assume that each myosin-binding process is an independent event. For each binding site, myosin occupancy ( $O$ ) is defined as the probability of binding. Global fitting of the different conditions to a binomial distribution yielded a myosin occupancy of  $0.94 \pm 0.1$ . (C) Calculated stacked histograms of the population distribution for each condition. The analysis was limited to scaffolds with 3 myosins due to the large number of free parameters in the fitting step. The high myosin occupancy is consistent with similar values estimated from the photon counting assays ( $O = 0.92\text{--}0.97$ ; Figs. 2E–G).

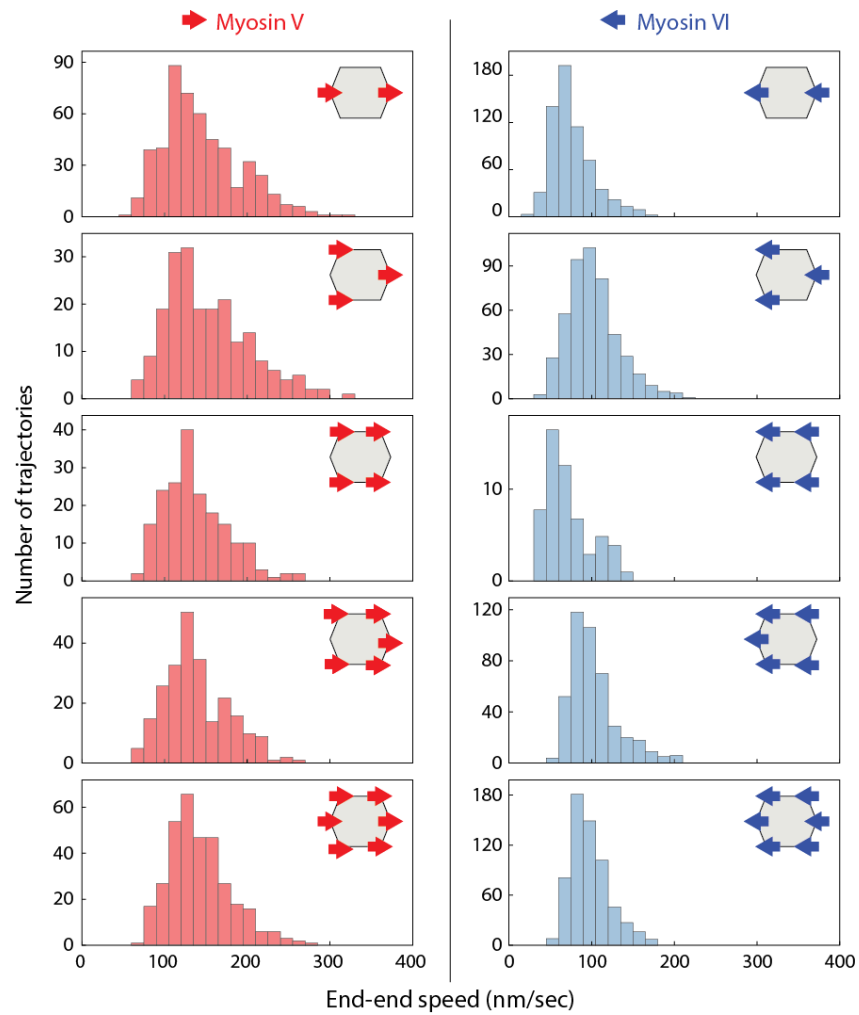

**Figure S8 – End-to-end speed distributions for scaffolds with either myosin V or VI** – Histograms of end-end speed for the indicated configuration (upper right corner of each histogram) of myosin V (red; left panels) or myosin VI (blue; right panels). Short trajectories ( $RL < 1 \mu\text{m}$ ) are excluded from the data analysis. For either motor type the collective speed does not depend on multi-motor number ( $P < 0.002$ ,  $N_V \geq 71$ ,  $N_{VI} \geq 58$ ). Myosin V scaffolds (regardless of motor number) move significantly faster than those with myosin VI ( $P < 0.01$ ,  $N \geq 58$ ).

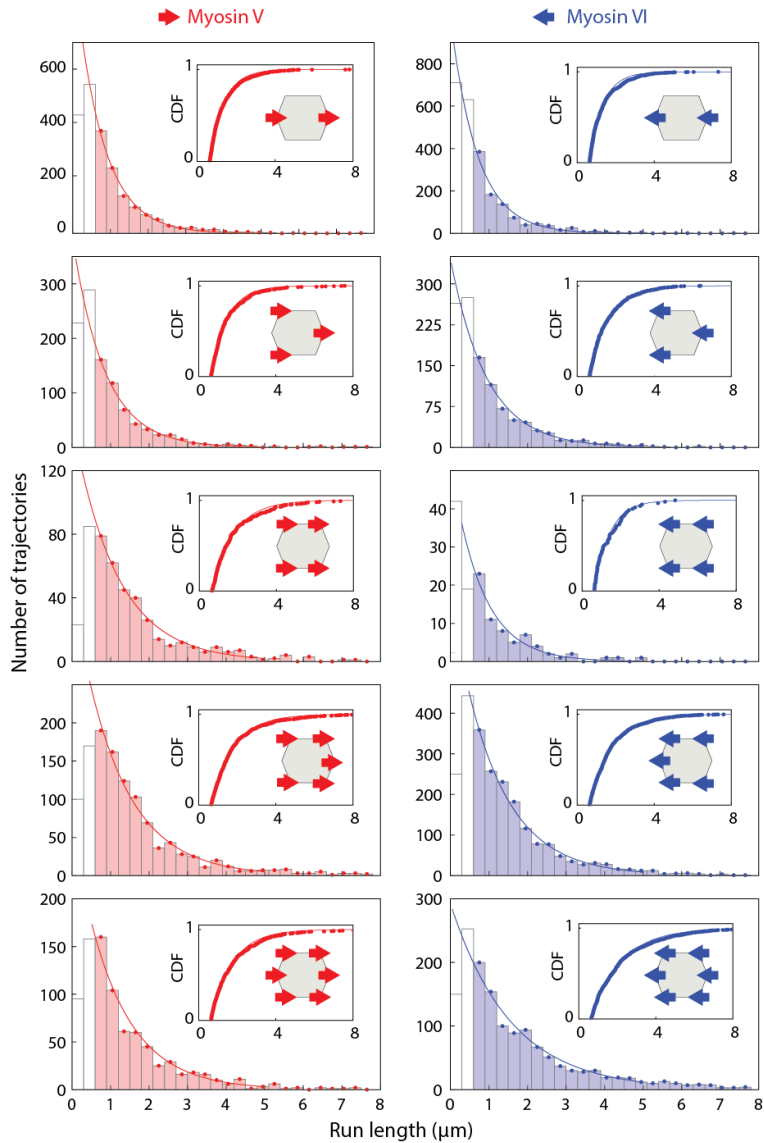

**Figure S9 – Run length distribution for scaffolds with multiple myosin V or VI** – Run length histograms of scaffolds with myosin V (red; left panels) or myosin VI (blue; right panels). The number and configuration of myosin V (red) and myosin VI (blue) are shown in the insets. Solid lines are single exponential fits based on the cumulative distributive functions (CDF; insets), with a minimum measurable run length (threshold) of 600 nm. The white bars are runs shorter than 600 nm (the number of short runs is an underestimate as they are limited by the spatial and temporal resolution of our image acquisition). For both myosin types, the run length increases with motor number and is summarized in Fig. 3B of the main text.

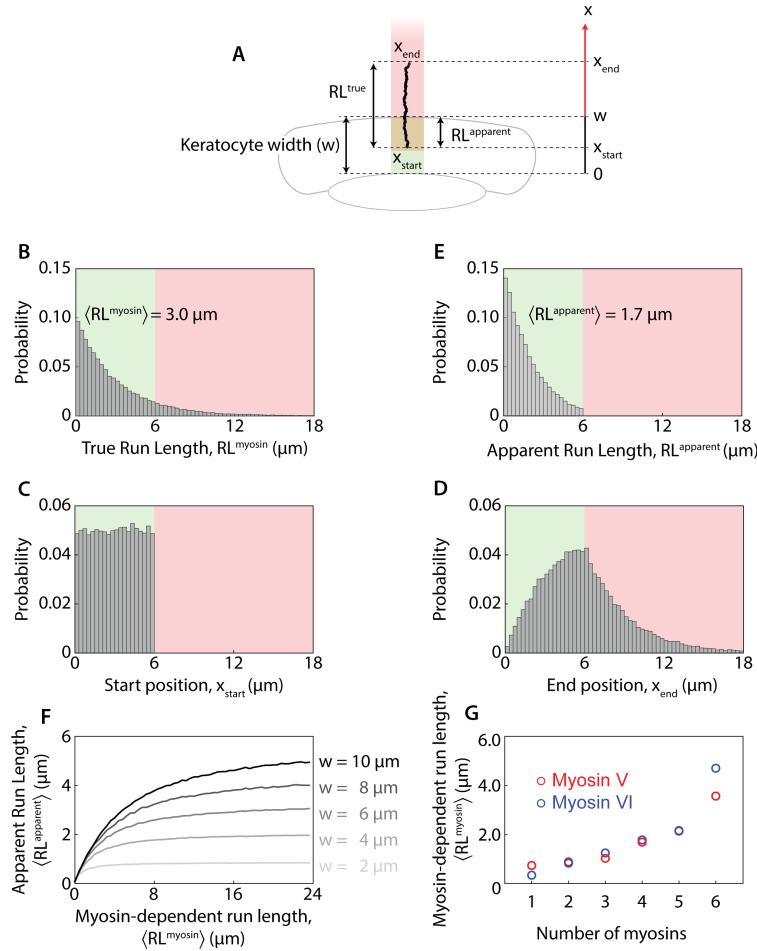

**Figure S10 – The measured run length is limited by the finite width of the keratocyte actin network** – (A) Model for scaffold movement on an infinitely long one-dimensional track. On keratocytes, the track is limited by the keratocyte width  $w$ , which is displayed as the green-shaded region in all panels. Scaffolds that enter the red-shaded region are truncated at the keratocyte boundary  $x=w$ . (B) On an infinitely long track, the distribution of myosin-dependent run lengths ( $RL_i^{myosin}$ ) follows a single exponential distribution. (B-E) The relationship between myosin-dependent and observed (apparent) run lengths is illustrated with  $w = 6 \mu\text{m}$  and  $\langle RL^{myosin} \rangle = 3 \mu\text{m}$ . (C) The start position  $x_i^{start}$  of trajectory  $i$  is uniformly distributed between 0 and  $w$ . (D) Trajectory  $i$  dissociates from the track at  $x_i^{end} = x_i^{start} + RL_i^{myosin}$ . Due to the limited keratocyte width, trajectories that travel beyond the keratocyte periphery get truncated at  $x = w$ . Based on this model, the limited track length preferentially truncates long trajectories. (E) As a consequence, the mean apparent run length  $\langle RL^{apparent} \rangle$  is calculated to be  $1.7 \mu\text{m}$ , well below  $\langle RL^{myosin} \rangle = 3.0 \mu\text{m}$ . (F) The mean apparent run length of scaffold-motor complexes with  $0 < \langle RL^{myosin} \rangle < 24 \mu\text{m}$  on a keratocyte track of width  $w = 2, 4, 6, 8,$  and  $10 \mu\text{m}$ . Based on the model, the limit of mean apparent run length  $\langle RL^{apparent} \rangle$  on a keratocyte track of width  $w$  is  $w/2$ . (G) Estimated myosin-dependent run lengths for average keratocyte width ( $w$ ) of  $6 \mu\text{m}$ .

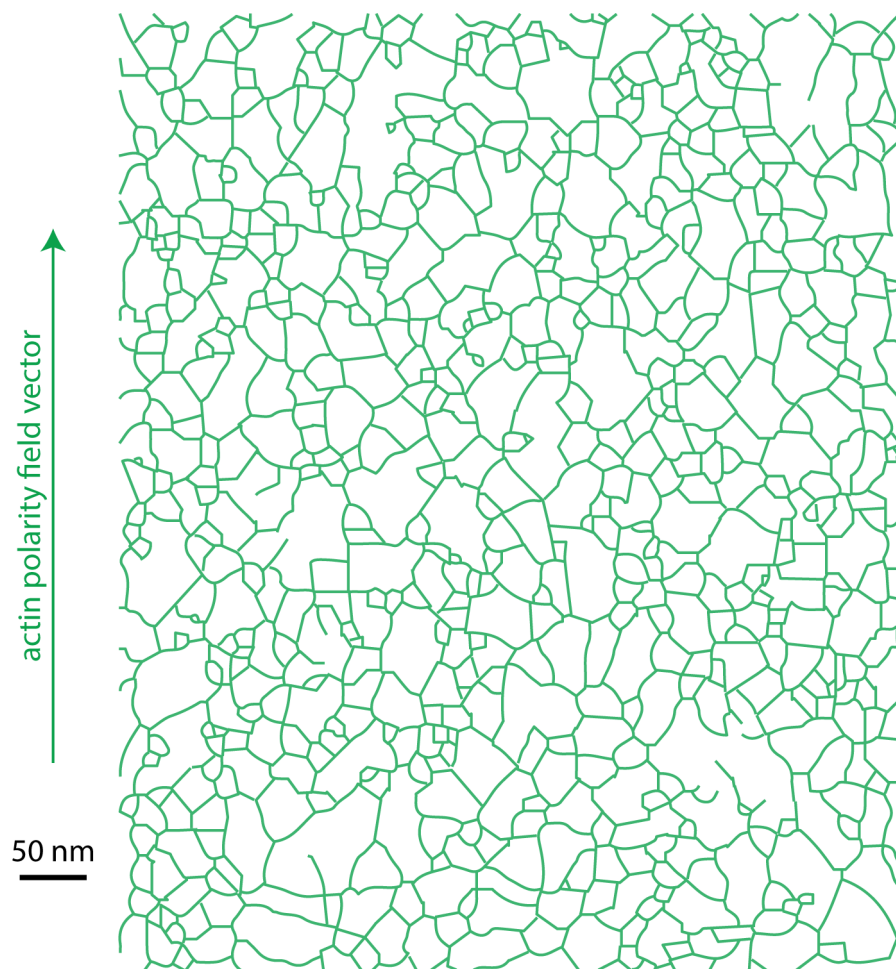

**Figure S11** – Skeletonized TEM image of the interlaced actin network used in the stochastic simulation (Fig. S12). The actin polarity field vector (green arrow) points upward. Given that the pore size of the meshwork ( $\sim 30$  nm; *Sivaramakrishnan and Spudich, J. Cell. Biol., 2009*) is substantially smaller than that of the origami scaffold, this analysis is restricted to filaments located near the keratocyte surface with depth information derived from the intensity of the platinum replica micrographs (see Methods).



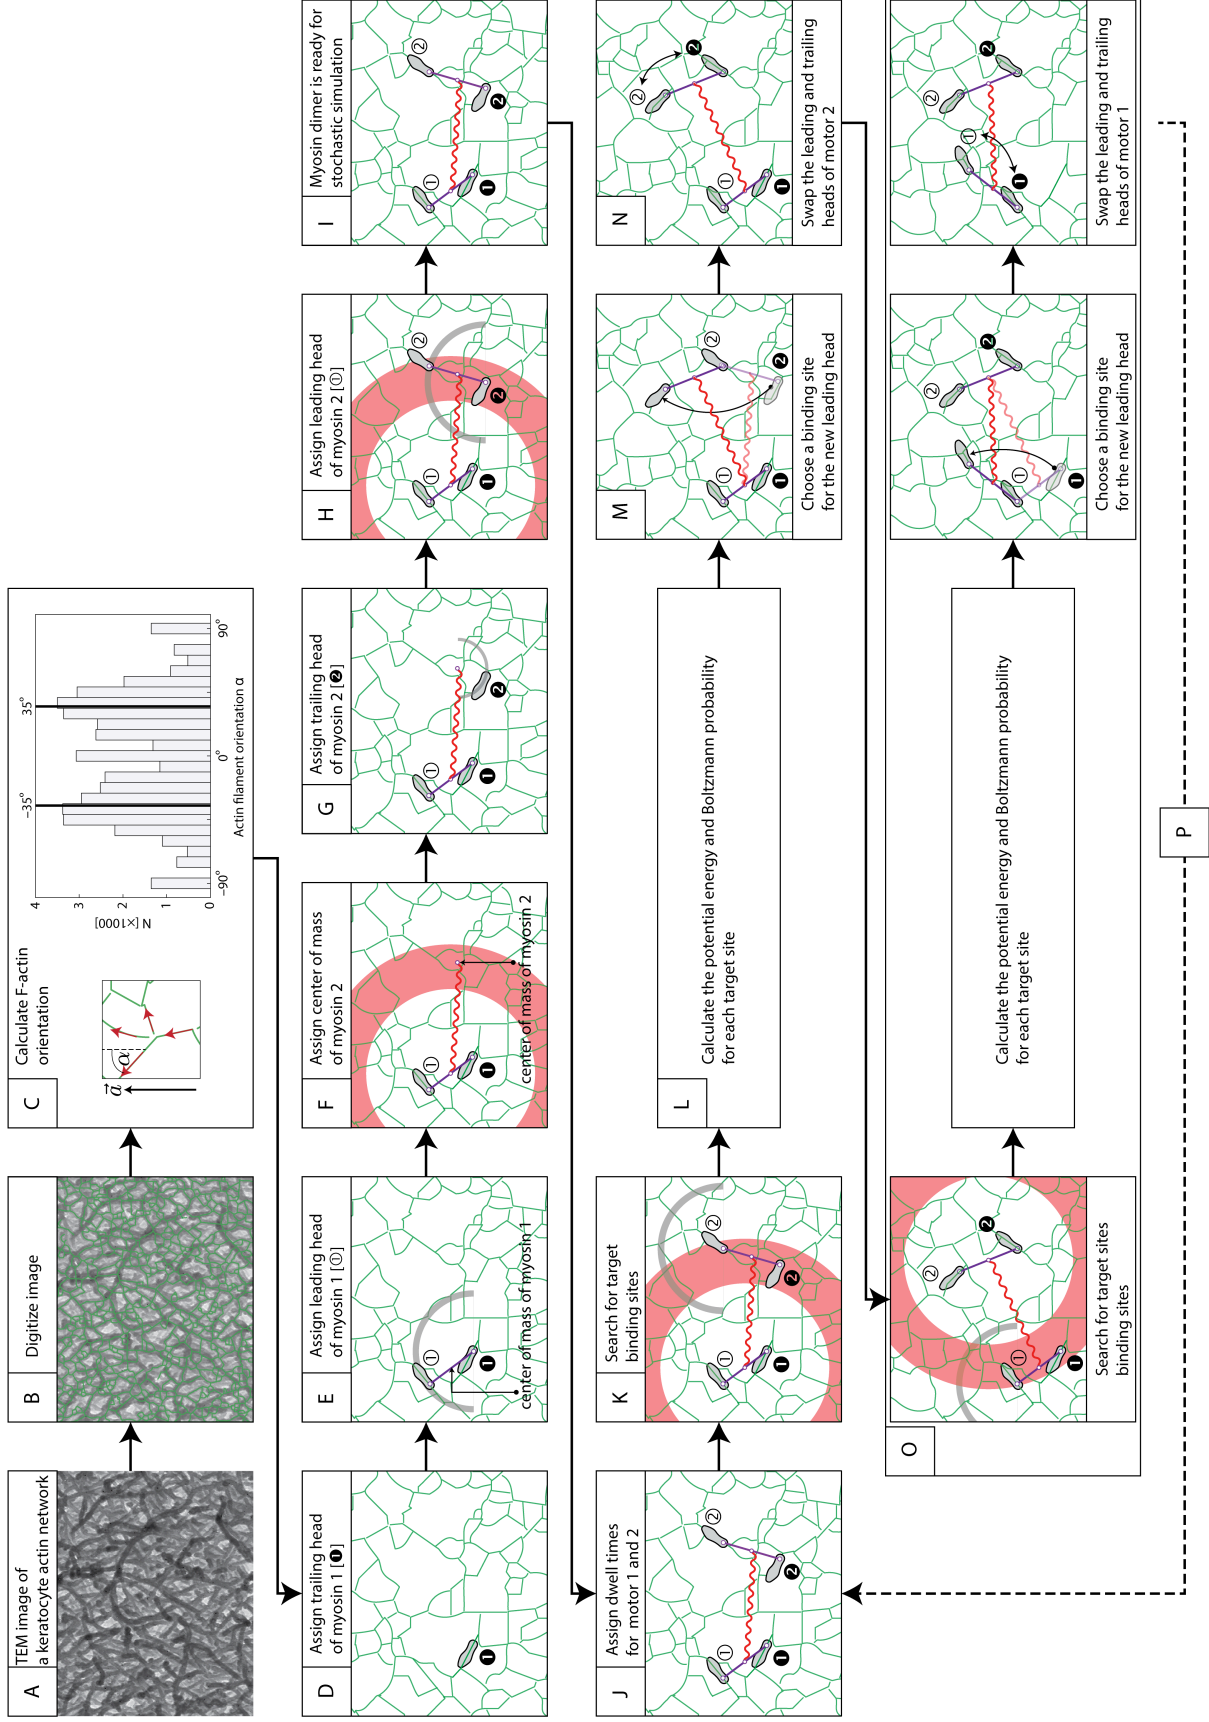

**Figure S12 (previous page) – Description of stochastic simulation –**

Stochastic simulations of myosin-scaffold movement on the digitized actin network were performed using a custom MATLAB code based on the rules described below.

- (A) Platinum replica micrograph image of a keratocyte actin network. This image is used to simulate long movement trajectories using periodic boundary conditions.
- (B) The position of actin filaments (green lines) was derived from the digitized image of actin network in (A) as described in *Sivaramakrishnan and Spudich, J. Cell. Biol., 2009*. Each pixel is a possible microstate for the myosin head.
- (C) For every pixel in the skeletonized image, we calculate the orientation of the actin filament relative to the actin polarity field vector. A 7x7 search box, centered on each actin filament pixel is fitted to a linear function. The local actin filament direction is the inverse tangent (*arctan*) of the slope of the fit line. Actin pixels with low goodness of fits ( $R^2 < 0.25$ , 14% of the detected pixels in (B)) were excluded from the simulation in order to exclude multi-filament junctions. The local filament directions are stored in order to calculate microstate energies used in step (L).

In our model, a myosin dimer consists of 2 identical myosins with lever arm stiffness  $k_f$  (Fig. 4B) or 2 unique myosins with lever arm stiffness  $k_{f1}$  and  $k_{f2}$  (Fig. 6E). The centers of mass of myosin 1 and 2 are linked by a linear spring  $k_s$ . Each myosin motor comprises 2 motor domains (gray sandals). Each myosin has a leading ( $\textcircled{1}$  or  $\textcircled{2}$ ) and trailing head ( $\textcircled{1}$  or  $\textcircled{2}$ ).

- (D) The trailing head of motor 1 is positioned randomly on an actin filament.
- (E–H) The position of the leading head (E) and the second myosin (F–H) are randomly assigned such that the distance between the heads is  $36 \pm 4$  nm (gray arc; (E and H)) and the centers of mass of the two motors are within  $65 \pm 15$  nm (red ring; (F and H)).
- (I) At each simulation step, we keep track the position of 4 myosin heads, 2 centers of mass, and the center of the two centers of mass.
- (J) Myosin dimers step stochastically with an exponentially distributed dwell time on the actin filament. Hence, the dwell times for each step are derived from an exponential distribution of mean dwell times based on the cycle rates of myosin V and VI [*De La Cruz et al., PNAS 1999; De La Cruz et al., J. Biol. Cell. 2001*]. The myosin with the shortest dwell takes the first step. For illustration purpose,  $t_1 > t_2$ , and myosin 2 moves first.
- (K) The trailing head pivots about the lead head. The next binding site is determined by the following criteria:
  - a. within  $36 \pm 4$  nm pixel from the leading head (gray arc),
  - b. the new center of mass is within  $65 \pm 15$  nm (red ring) from the center of mass of the other motor (myosin 1), and
  - c. myosins proceed in forward direction based on the polarity of the actin network.
- (L) We calculate the energy and Boltzmann probability (Fig. 4B) for each selected pixel.

- (M) Based on the Boltzmann probability of each pixel, we stochastically choose the binding site for the new leading head.
- (N) The old leading head is now assigned as the new trailing head and the coordinates of the centers of mass are reassigned.
- (O–P) The process is repeated for the other myosin (J–N) followed by repetitions of (J–O) to generate trajectories.

For each condition, the simulation was repeated for  $\geq 4$  times. Simulated trajectory shapes were quantified in terms of shape factor (Fig. S2). To construct the shape factor plots in Figs. 4, S13, and S14, the mean shape factors were fitted to a sigmoidal function (solid lines in Figs. 4 and S14; dashed line in Fig. S13) below:

$$S(x) = S_o + a \frac{1}{1+e^{-(x-x_o)}}, \text{ where } S_o, a, x_o \text{ are the fitting parameters and } x = 10^{k_s/k_s}.$$

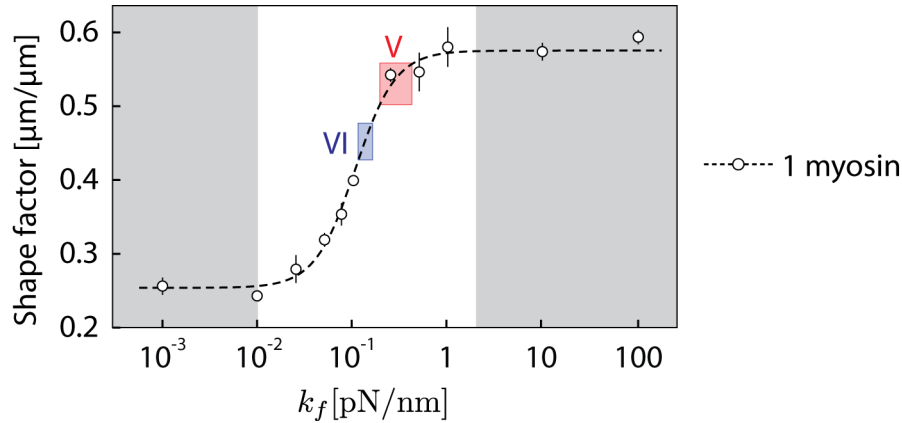

**Figure S13 – Lever arm rigidity controls the trajectory shapes for single myosins –** Shape factor of simulated trajectories is influenced by the lever arm stiffness  $k_f$ . Therefore, the rigidity of the lever arm can be tuned to match the observed trajectory shapes in Fig. 1 of the main text. The experimentally measured shape factors for single myosin V (red-shaded box) or myosin VI (blue-shaded box) were used to calculate corresponding lever rigidities ( $k_f$ ) of  $0.30 \pm 0.18$  pN/nm and  $0.16 \pm 0.02$  pN/nm, respectively. Movement trajectories of single myosins with either thermally flexible ( $k_f L^2 < k_B T$ ) or rigid ( $k_f L^2 \gg k_B T$ ) lever arms are insensitive to  $k_f$  (gray-shaded regions).

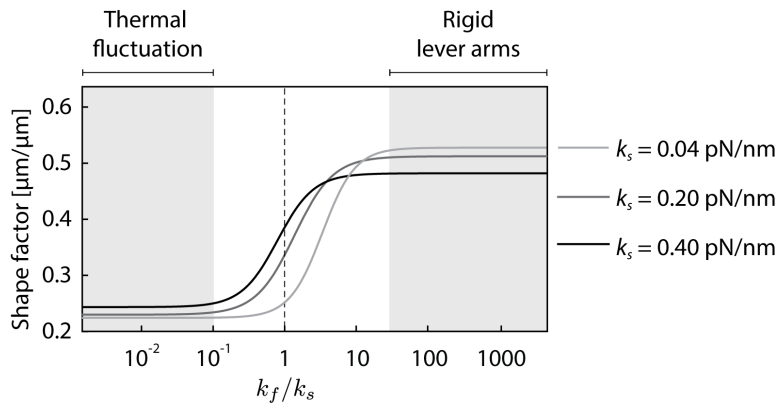

**Figure S14 –** Shape factors for simulated trajectories of scaffolds with 2 myosin motors connected by an inter-motor spring with stiffness ( $k_s$ ) = 0.04, 0.20, and 0.40 pN/nm. Sigmoidal lines are derived from simulations with varying  $k_f/k_s$  for indicated  $k_s$  values. These simulations support  $k_f/k_s$  as the primary determinant of trajectory shape factor. Data presented in the main text are for  $k_s = 0.20$  pN/nm. Gray regions indicate regimes dominated by thermal fluctuation or rigid lever arms.

## Legends for Movies S1 and S2

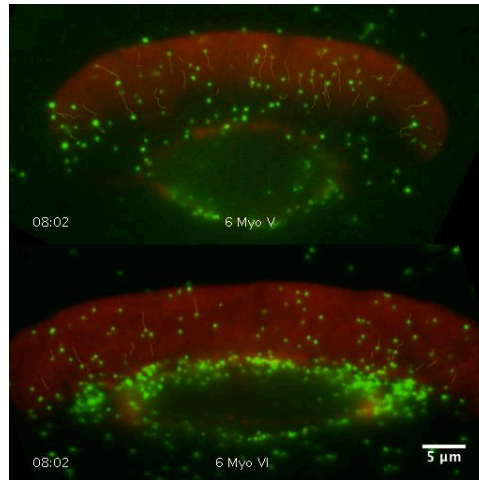

**Movie S1** – **(top)** Movie of scaffolds with 6 myosin V (green) meandering on a keratocyte actin network (red) (Fig. 3C). **(bottom)** Scaffolds with 6 myosin VI (green) moving linearly on the two-dimensional network (Fig. 3D). Data was acquired at 2 Hz frame rate, 2 mM ATP, RT.

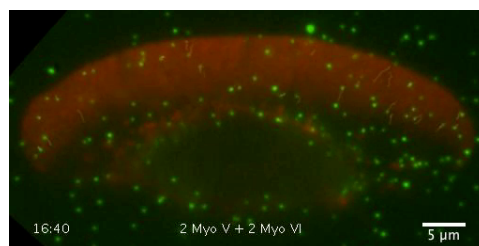

**Movie S2** – Scaffolds with 2 myosin V and 2 myosin VI meandering on a keratocyte actin network (red) (Fig. 6A). Scaffolds travel unidirectionally, either towards the cell periphery or the cell center. Data collected at 2 Hz frame rate, 2 mM ATP, RT.

## Supplemental Notes S1

Computer aided staple strand sequences for the flat-rectangular DNA origami scaffold (Figs. S3–4)

### Core

|             |                                   |
|-------------|-----------------------------------|
| r0t11m11    | TTAGATACTATTTTCATTTGGGGAATGCCT    |
| r0t11mr1    | TAAGAACGGAGGTTTTGAAGCCTAGTCAGA    |
| r0t11mr2    | TAATGCAGTTCGAGCCAGTAATAACTGACCTA  |
| r0t11mr3    | AAATCAGAGCTATTTTGCACCCAGAGAATAAC  |
| r0t11mr_fr  | ATAAGTCCATATTTAACAACGCCGTGTGAT    |
| r0t11seam_l | AATATCGCTAAGAGGAAGCCCGAAACCTCCCG  |
| r0t11seam_r | CCAGACGACGACAAAAGGTAAGTATAACCTG   |
| r0t13m11    | GAGTAATGCGGAGACAGTCAAATAACGTTA    |
| r0t13mr1    | TAAAGTACCGACAATAAACACAGGTATTC     |
| r0t13mr2    | AATTTAATAAATGCTGATGCAAATTTTAAATG  |
| r0t13mr3    | GAGGCATTAACGCGCCTGTTTATCTTCATCGT  |
| r0t13mr_fr  | AAATAAGACCTTTTTAACCTCCGTGAGTGA    |
| r0t13seam_l | TTTAGCTAATTTGCAAATGGTCAAATTCGT    |
| r0t13seam_r | TATATTTTAGAACGCGAGAAAACTAAAGGGTG  |
| r0t15mr1    | CAAGACAAAGTTAATTTTCATCTTGAGAATA   |
| r0t15mr3    | CTATATGTGGTTGAAATACCGACCAACATGT   |
| r0t15mr_fr  | ATAACCTACAATAACGGATTTCGTTATACTT   |
| r0t15seam_l | AGAAAGGCTGTAGGTAAGATTTCATTTTCAA   |
| r0t17mr3    | TCAATTACACATAAATCAATATATGGCTTAGG  |
| r0t19m11    | CCACACAAGGGGTGCCTAATGAGAGCAGGC    |
| r0t19m13    | TCCTGTGTAATTGCGTTGCGCTCAAGAGAGTT  |
| r0t19mr2    | CCCTCAATTAACACCGCCTGCAACATTCACCA  |
| r0t19mr_fr  | AACAGTTCACCAGCAGAAGATACATTCGT     |
| r0t19seam_r | AGCATCACGCCAGCAGCAAATGAAATAAAGTG  |
| r0t1m11     | TCCAAAAGTTTCGAGGTGAATTTGTAATGC    |
| r0t1mr2     | TTTAACGGGAATGAAAAGCGCAGTCCATCTTT  |
| r0t1seam_r  | TTGATGATTCAGTAAGCGTCATACGGTTTAT   |
| r0t1t_seam  | CGCCACCCTCAGAACC GCCACCCTCAGAACCG |
| r0t1t11     | CCACCCTCAGAGCCACCACCCTCAAAGGC     |
| r0t1t12     | GGATAGCAAGCCCAATAGGAACCCCAACAGTT  |
| r0t1t13     | TAACACTGAGTTTCGTCACCAGTTTTTCTGT   |
| r0t1tr1     | GGTGTATCACCGTACTCAGGAGGTTAATAAGT  |
| r0t21m11    | GAAAATCCCCTTATAAATCAAACGGCGAA     |
| r0t21m13    | AAGCGGTCGGTTGAGTGTGTTCCGAGCCCC    |
| r0t21m1_fl  | TTTCCAGTCGTAATCATGGTCACGAAAGGG    |
| r0t21mr2    | GTCACACGTTGCAACAGGAAAACTAAAGGGA   |
| r0t21mr3    | GTCAGTATCAATATCTGGTCAGTTGCCCGAAC  |

|             |                                    |
|-------------|------------------------------------|
| r0t21mr_fr  | GCCAACATGCTGGTAATATCCAAATCCTGA     |
| r0t21seam_r | AAATGGATTACATTTTGACGCTCACGAAATCG   |
| r0t23b_seam | CGTGGCGAGAAAGGAAGGGAAGAAAATCAGAG   |
| r0t23b11    | GATTTAGAGCTTGACGGGAAAGCGAATAGCC    |
| r0t23br1    | CGGGAGCTAAACAGGAGCCGATGCTCATG      |
| r0t23br2    | TTTTAGACAGGAACGGTACGCCAGGAACAATA   |
| r0t23br3    | GAAGTGTTTTATAATCAGTGAGCTCAAAT      |
| r0t23m12    | CGAGATAGCACGCTGGTTTGCCCTGAGCTAA    |
| r0t23m1_fl  | ACAAGAGCACCGCTGGCCCTGCTGCCCGC      |
| r0t23mr1    | GAAATACCTATTTACATTGGCAGAGTGCCA     |
| r0t23mr3    | GCCAGCCAACCAGTAATAAAAGGAAAACAGA    |
| r0t23seam_l | GCAAAATCTGTTTGATGGTGGTTCATCGTCTG   |
| r0t3m11     | CACTACGAATACACTAAAACACTATCTTGA     |
| r0t3m12     | GCTTGATATTGAAAACTCCAAAAATTTTCAG    |
| r0t3m13     | GTTTCCATCGATTATACCAAGCGGACCAGGC    |
| r0t3m1_fl   | ACAACCATTGCTAAACAACCTTATGTACCG     |
| r0t3mr1     | TTTACCGTACAGGAGTGACTGGTTAGTAC      |
| r0t3mr2     | TCATAATCAATCAAGTTTGCCTTTCAAAGGG    |
| r0t3mr3     | TAAAGCCAGGTCAGTGCCTTGAGTGATATAAG   |
| r0t3mr_fr   | ACCGGAATCGATAGCAGCACCGGAAGGTAA     |
| r0t3seam_l  | CAGCTTGCGAGCCTTTAATTGTATCATGGCTT   |
| r0t3seam_r  | CATAGCCCCGCGTTTTTCATCGGCACGAAAGAG  |
| r0t5m11     | CAAGAACCCTGCTCATTTCAGTGAAATGCAG    |
| r0t5m12     | ACCCCAGTAAACGGGTAAAAATACCTTAAACA   |
| r0t5m1_fl   | GTACAACCTTTGAGGACTAAAGCAATGACA     |
| r0t5mr1     | GACTGTAGCCTTATTAGCGTTTGCTCTGAA     |
| r0t5mr2     | CGACATTCGAAACGCAAAGACACCATAATAAG   |
| r0t5mr3     | AGCGACAGAAAATCACCGGAACCACAAACAAA   |
| r0t5mr_fr   | ATATTGAGCAAACGTAGAAAATAGCTATCT     |
| r0t5seam_l  | GCAAAAGAAGGCACCAACCTAAAATTTTCGGT   |
| r0t5seam_r  | ATATGGTTTTTGTCACAATCAATAAATCAACG   |
| r0t7m11     | ATACATAAAACACTATCATAACCTTGCATC     |
| r0t7mr1     | AAGTTTATTACCAGCGCCAAAGAAGCGTCA     |
| r0t7mr2     | AGCAAGAATGAACACCCTGAACAATAAATCAA   |
| r0t7mr3     | ATATAAAAAACCGATTGAGGGAGGTAATCAGT   |
| r0t7mr_fr   | TACCGAAGCAGCCTTTACAGAGCTACAATT     |
| r0t7seam_l  | TAACAAAAGGGATATTTCATTACCCAGAAAATTC |
| r0t7seam_r  | CCACAAGAGAGCGCTAATATCAGAGAGGCATA   |
| r0t9m11     | AAAAAGATGTTTAAATTCGAGCTTTGACCA     |
| r0t9mr1     | GGGTAATTATTGAGTTAAGCCCAACGGAAAT    |
| r0t9mr2     | GATTAGTTTATAGAAGGCTTATCCTGTTGAGC   |
| r0t9mr3     | GAATTAACACAATGAAATAGCAATACATACAT   |

|            |                                   |
|------------|-----------------------------------|
| r0t9mr_fr  | TTATCCTCAAGCCGTTTTTATTAACAATAG    |
| r0t9seam_l | GTAAGAGCCGCCAAAAGGAATTACGAGATAAC  |
| r0t9seam_r | ACTTGCGGCGAGGCGTTTTAGCGAAGACTTCA  |
| r1t0tr2    | GGATAAGTGCCGTCGAGAGGGTTAACAGTGC   |
| r1t0tr3    | TAGGATTAGCGGGTTTTGCTCAGTGCCTATT   |
| r1t10fr1   | AGAACAAGGAATCTTACCAACGCTGTCAAAAA  |
| r1t10fr2   | TCTTTCCATTAAACCAAGTACCGCATATCCCA  |
| r1t10fr3   | AACGGGTAGAGCCTAATTTGCCAAATCCAA    |
| r1t12fr1   | AGAATCGCCTGAACAAGAAAAATAACTCATCG  |
| r1t12fr3   | TAAAGCCATACGAGCATGTAGAATTCCAAG    |
| r1t14fr1   | GAGAGACTGCGTTAAATAAGAATACTTAATTG  |
| r1t14fr2   | AATCATAATGAATTTATCAAAATCCGCTATTA  |
| r1t14fr3   | GTCAATAGTTACTAGAAAAAGCCACCAGTA    |
| r1t16fr1   | CGGGAGAATGCTTCTGTAAATCGTATAGGTCT  |
| r1t16fr2   | ATTAATTTATACAGTAACAGTACCCTACCATA  |
| r1t16fr3   | AGATGAATTCCTTAGAATCCTTGAGAAGA     |
| r1t18fr1   | CGACAACATATGAAGGGTTAGAACTTTTACAT  |
| r1t18fr2   | TCAAAATTAAGTATTAGACTTTACGGTTATCT  |
| r1t18fr3   | GGATTTAGATTTGCACGTAAAACTAACGTC    |
| r1t20fr1   | CGAACGAAGAAAGGAATTGAGGAAAAACAATT  |
| r1t20fr2   | AAAATATCCTAAAACATCGCCATTGACCTGAA  |
| r1t20fr3   | TGATAGCCTTTAGGAGCACTAACCATTTGA    |
| r1t22fr1   | ATCGGCCTGAGATAGAACCCTTCTAAAAATAC  |
| r1t22fr2   | AGCGTAAGTGCCTGAGTAGAAGAAGCCACCGA  |
| r1t22fr3   | ACATCACTAATACGTGGCACAGACGCGAAC    |
| r1t24br4   | GTAAAAGAGTCTGTCCATCACGCAGTAATA    |
| r1t2fr1    | CAGACGATAACAGTTAATGCCCCCTACCAGGC  |
| r1t2fr2    | TCGGAACCCATTGACAGGAGTTGCGCCACCC   |
| r1t2fr3    | GCCGCCAGTATTATTCTGAAACAGAAGGAT    |
| r1t4fr1    | TGAAACCACCGCTCCCTCAGAGCAGGCAGGT   |
| r1t4fr2    | TCAGAACCTAGCAAGGCCGGAACAAGGTGAA   |
| r1t4fr3    | ATTACCATGCCACCCTCAGAGCCAGAGCC     |
| r1t6fr1    | GTATGTTACGGAAATTTATTCATTAGTCACCAA |
| r1t6fr2    | TTATCACCATGATTAAGACTCCTTGTAAAGCAG |
| r1t6fr3    | GAACTGGCGTCACCGACTTGAGCTAGCACC    |
| r1t8fr1    | TGAAAAATAGCCCTTTTTAAGAAAAATTACGCA |
| r1t8fr2    | ATAGCCGACGATTTTTTGTTTAACAACGAGCG  |
| r1t8fr3    | ATAAGAAAACAAAGTTACCAGAACCCAAAA    |
| r-1t0t14   | CAACGCCTGTAGCATTCCACAGATTTGTCTG   |
| r-1t10f11  | AAACGAGAGAGTACCTTTAATTGCTACGGTGT  |
| r-1t10f12  | ATAAGAGGCTCAAAATGCTTTAAACAGAGGGGG |
| r-1t10f13  | GAATCCCTCATTTTTGCGGATGAGCTCAA     |



|           |                                   |
|-----------|-----------------------------------|
| r-1t12f12 | GGCAAAGAAAATATGCAACTAAAGTCCTTTTG  |
| r-1t12f13 | CATGTTTTATTAGCAAAATTAAGTTGTACC    |
| r-1t14f11 | GAGAAGCCGAGAGGGTAGCTATTTTCATATGTA |
| r-1t14f12 | TCTACAAATATGACCCTGTAATACACAGGCAA  |
| r-1t14f13 | AAAAACATGGCTATCAGGTCATTTGAACGG    |
| r-1t16f11 | CCCCGGTTGCTTTCATCAACATTACGTAACCG  |
| r-1t16f12 | CGAGTAACAACTAGCATGTCAATTTGAGAGA   |
| r-1t16f13 | TAATCGTAAACCCGTCGGATTCTGGATAGG    |
| r-1t18f11 | TGCATCTGCTGCAAGGCGATTAAGGGTACCGA  |
| r-1t18f12 | CGCCAGGGGTGTAGATGGGCGCATAATGTGAG  |
| r-1t18f13 | TCACGTTGTTTTCCAGTCACGAATGCCTG     |
| r-1t20f11 | GCTCGAATTCGGGAAACCTGTCGTACAGCTGA  |
| r-1t20f12 | CATTAATGCTCTAGAGGATCCCCGTTGGGTAA  |
| r-1t20f13 | CAGGTCGAAATCGGCCAACGCGCGTGGTTT    |
| r-1t22f11 | TTGCCCTTTCCACTATTAAAGAACGCCGTAAA  |
| r-1t22f12 | CAACGTCAACCAGTGAGACGGGCAGCCAGCTG  |
| r-1t22f13 | TTCTTTTCAAGGGCGAAAAACCGTCACCCA    |
| r-1t24b12 | GCACTAAATCGGAACCTAAAGGAGTTTGA     |
| r-1t24b13 | AATCAAGTTTTTTGGGGTCGAGGTGTGGACTC  |
| r-1t2f11  | ATGGGATTTTCGCCACGCATAACCGCAACGGC  |
| r-1t2f12  | CGGTCGCTGACGTTAGTAAATGAAACAACTA   |
| r-1t2f13  | TCTTTCCAGAGGCTTGCAGGGAGAGCAGCG    |
| r-1t4f11  | TACAGAGGGGAGATTTGTATCATCACTTTGAA  |
| r-1t4f12  | AATTGTGTCATCGGAACGAGGGTAGATATATT  |
| r-1t4f13  | AAAGACAGCGAAATCCGCGACCTACGGTCA    |
| r-1t6f11  | AGAGGACACTTGAGATGGTTTAATAACGAACT  |
| r-1t6f12  | TAATCATTTGGAACCGAACTGACCAGCCTGATA |
| r-1t6f13  | ATCATAAGGTGAATTACCTTATGGGACGTT    |
| r-1t8f11  | AACGGAACCAAAAGAAGTTTTGCCAGTTCAGA  |
| r-1t8f12  | TAATAGTAAAATCTACGTTAATAATCAACTT   |
| r-1t8f13  | GGGAAGAAAAATGTTTAGACTGGATTCATT    |
| rt-rem1   | AGCACGTATAACGTGCTTTCCTCGTTAG      |
| rt-rem2   | ACAGGGCGCGTACTATGGTTGCTTTGACG     |
| rt-rem3   | ACCACACCCGCGCGCTTAATGCGCCGCT      |
| rt-rem4   | CAAGTGTAGCGGTACGCTGCGCGTAACC      |
| rt-rem5   | AGCGAAAGGAGCGGGCGCTAGGGCGCTGG     |

**Edge staples that binds to Cy3-labeled oligo3 (complementary sequence to oligo3 in lowercase)**

|                         |                                                       |
|-------------------------|-------------------------------------------------------|
| oligo3-TT-Cy3           | agctgcaggctcgacctgctgTT/3Cy3Sp/                       |
| r1t0_edge_r_2_RC_oligo3 | TTTTTTTAGACTCCTCAAGATGAAAGTATTAAGcgcaggtcgagcctgcagct |
| r1t2_edge_r_2_RC_oligo3 | TTTTTTTCCAGAACCACCACACCCTCAGAGcgcaggtcgagcctgcagct    |
| r1t4_edge_r_2_RC_oligo3 | TTTTTTTGCAAAATCACCAGCATTGGGAATTAcgcaggtcgagcctgcagct  |

|                             |                                                          |
|-----------------------------|----------------------------------------------------------|
| r1t6_edge_r_2_RC_oligo3     | TTTTTTTTTAATAACGGAATAGGAAACCGAGGAACgcaggtcgagcctgcagct   |
| r1t8_edge_r_2_RC_oligo3     | TTTTTTTTTATTATTTTATCCCGTTACAAAATAAAcgcaggtcgagcctgcagct  |
| r1t10_edge_r_2_RC_oligo3    | TTTTTTTTTCTTTCCTTATCAACCAATCAATAATcgcaggtcgagcctgcagct   |
| r1t12_edge_r_2_RC_oligo3    | TTTTTTTTTATACAAATCTTTTGTAGTATCATcgcaggtcgagcctgcagct     |
| r1t14_edge_r_2_RC_oligo3    | TTTTTTTTTAGATTAAGACGCTGAAAACATAGCGAcgcaggtcgagcctgcagct  |
| r1t16_edge_r_2_RC_oligo3    | TTTTTTTTTAGATTTTCAGGTTAGAAAATAAGAAAcgcaggtcgagcctgcagct  |
| r1t18_edge_r_2_RC_oligo3    | TTTTTTTTTCAATAGATAATAAACTAATAGATTAcgcaggtcgagcctgcagct   |
| r1t20_edge_r_2_RC_oligo3    | TTTTTTTTTTAGTCTTTAATGCAATATTTTTGAAcgcaggtcgagcctgcagct   |
| r1t22_edge_r_2_RC_oligo3    | TTTTTTTTTACTTCTTTGATTAATTAACCGTTGcgcaggtcgagcctgcagct    |
| r---1t2_edge_l_2_RC_oligo3  | TTTTTTTTTAACGATCTAAAGTCAGCCCTCATAGTcgcaggtcgagcctgcagct  |
| r---1t4_edge_l_2_RC_oligo3  | TTTTTTTTTGATCGTCACCTCTTAAAGCCGCTTcgcaggtcgagcctgcagct    |
| r---1t6_edge_l_2_RC_oligo3  | TTTTTTTTTGAACGAGGCGCAGGCTCCATGTTACTcgcaggtcgagcctgcagct  |
| r---1t8_edge_l_2_RC_oligo3  | TTTTTTTTTATTATACCAGTCACGATTTTAAGAACcgcaggtcgagcctgcagct  |
| r---1t10_edge_l_2_RC_oligo3 | TTTTTTTTTAATCGTCATAAATATAGCGTCCAATAcgcaggtcgagcctgcagct  |
| r---1t12_edge_l_2_RC_oligo3 | TTTTTTTTTAATATAATGCTGTGCTTAGAGCTTAAcgcaggtcgagcctgcagct  |
| r---1t14_edge_l_2_RC_oligo3 | TTTTTTTTTAAAGCTAAATCGGCAATAAAGCCTCA cgcaggtcgagcctgcagct |
| r---1t16_edge_l_2_RC_oligo3 | TTTTTTTTTACAAGAGAATCGAGCCTGAGAGTCTGcgcaggtcgagcctgcagct  |
| r---1t18_edge_l_2_RC_oligo3 | TTTTTTTTTATTGACCGTAATGCCGTGGGAACAAAcgcaggtcgagcctgcagct  |
| r---1t20_edge_l_2_RC_oligo3 | TTTTTTTTTGTGCCAAGCTTGCCGTTGTAAAACGAcgcaggtcgagcctgcagct  |
| r---1t22_edge_l_2_RC_oligo3 | TTTTTTTTTATTGGGCGCCAGGGGGAGAGGGGTcgcaggtcgagcctgcagct    |
| r---1t24_edge_l_2_RC_oligo3 | TTTTTTTTTACTACGTGAACCATCTATCAGGGCGAcgcaggtcgagcctgcagct  |

**Core staples that bind to oligo1-myosin VI**  
BG-oligo1

|                           |                                                       |
|---------------------------|-------------------------------------------------------|
| r0t1mr_fr-TR-oligo1       | TTTTTTgatacgcgccaatctctata                            |
| r1t12fr2-MR-oligo1        | CCGTATATGGCCTTGATATTCAGAGCCACctatagagattggcgcgtatc    |
| r0t17mr_fr-BR-oligo1      | tatagagattggcgcgtatcTCCTAATTACGCTCAACAGTAGGGAACACCGG  |
| r0t17ml3_hp_org-BL-oligo1 | CTGAATACGTATTAATCCTTTGGCAAATCtatagagattggcgcgtatc     |
| r-1t12f11-ML-oligo1       | CAGCTTTCCTATTACGCCAGCTGGTAGCTGTTtatagagattggcgcgtatc  |
| r0t1ml3-TL-oligo1         | tatagagattggcgcgtatcCTGGAAGTACATCCAATAAATCATTTTTGGCGG |
|                           | TTTTTCAGCCGATAGTTGCGCCGAACTTTTTCtatagagattggcgcgtatc  |

**Core staples that bind to oligo2-myosin V**  
BG-oligo2

|                           |                                                       |
|---------------------------|-------------------------------------------------------|
| r0t1mr_fr-TR-oligo1       | TTTTTTatgaacttgcgctcaattcc                            |
| r1t12fr2-MR-oligo1        | CCGTATATGGCCTTGATATTCAGAGCCACCggaattgagcgcaagttcat    |
| r0t17mr_fr-BR-oligo1      | ggaattgagcgcaagttcatTCCTAATTACGCTCAACAGTAGGGAACACCGG  |
| r0t17ml3_hp_org-BL-oligo1 | CTGAATACGTATTAATCCTTTGGCAAATCggaattgagcgcaagttcat     |
| r-1t12f11-ML-oligo1       | CAGCTTTCCTATTACGCCAGCTGGTAGCTGTTggaattgagcgcaagttcat  |
| r0t1ml3-TL-oligo1         | ggaattgagcgcaagttcatCTGGAAGTACATCCAATAAATCATTTTTGGCGG |
|                           | TTTTTCAGCCGATAGTTGCGCCGAACTTTTTCggaattgagcgcaagttcat  |

**Core staples that does not to either oligo 1 nor oligo2 (control)**

|                    |                                  |
|--------------------|----------------------------------|
| r0t1mr_fr-TR       | CCGTATATGGCCTTGATATTCAGAGCCACC   |
| r1t12fr2-MR        | TCCTAATTACGCTCAACAGTAGGGAACACCGG |
| r0t17mr_fr-BR      | CTGAATACGTATTAATCCTTTGGCAAATC    |
| r0t17m13_hp_org-BL | CAGCTTTCCTATTACGCCAGCTGGTAGCTGTT |
| r-1t12f11-ML       | CTGGAAGTACATCCAATAAATCATTTTTGCGG |
| r0t1m13-TL         | TTTTACGCCGATAGTTGCGCCGAACTTTTTC  |

**Purification strands**

|                       |                                                                 |
|-----------------------|-----------------------------------------------------------------|
| spacer-strand         | CGATGGATGACTGACTGATGGATGACTTAAATTGACTATGACTATGATACTGACTGATTACG  |
| biotin-strand         | CATCCATCAGTCAGTCATCCATCGTTTTTTT-biotin                          |
| origami-strand (r1t0) | TTTTTTTAGACTCCTCAAGATGAAAGTATTAAGTTGGATAGTCAGTATCATAGTCATAGTCAA |
| elution-strand        | CGTAATCAGTCAGTATCATAGTCATAGTCAATTTAAGTCATCCATCAGTCAGTCATCCATCG  |

**Strands for gliding assay**

|                  |                                   |
|------------------|-----------------------------------|
| Biotin-Oligo1-C1 | biotin-TTTTTTtatagagattggcgctatc  |
| Biotin-Oligo1-C1 | biotin-TTTTTTggaattgagcgcaagttcat |

### Supplemental Table S1 – Statistics

Numbers of trajectories analyzed for indicated experimental conditions. Experimental data were collected on at least four different keratocytes. The minimum number of detected trajectories was 112 and on average 852. End-to-end speed and shape factor analyses were restricted to long trajectories ( $RL \geq 1 \mu\text{m}$ ;  $N \geq 58$ ).

| Experiments                | N (trajectories) |                                                   |
|----------------------------|------------------|---------------------------------------------------|
|                            | All trajectories | Long trajectories;<br>$RL \geq 1.000 \mu\text{m}$ |
| Myosin V (– scaffold)      | 791              | 168                                               |
| Myosin VI (– scaffold)     | 1181             | 203                                               |
| DNA scaffold + 1 myosin V  | 413              | 71                                                |
| DNA scaffold + 2 myosin V  | 1688             | 501                                               |
| DNA scaffold + 3 myosin V  | 895              | 208                                               |
| DNA scaffold + 4 myosin V  | 385              | 191                                               |
| DNA scaffold + 5 myosin V  | 776              | 240                                               |
| DNA scaffold + 6 myosin V  | 1398             | 338                                               |
| DNA scaffold + 1 myosin VI | 317              | 64                                                |
| DNA scaffold + 2 myosin VI | 1897             | 636                                               |
| DNA scaffold + 3 myosin VI | 205              | 86                                                |
| DNA scaffold + 4 myosin VI | 112              | 58                                                |
| DNA scaffold + 5 myosin VI | 687              | 437                                               |

|                                         |      |     |
|-----------------------------------------|------|-----|
| DNA scaffold + 6 myosin VI              | 1185 | 617 |
| DNA scaffold + 6 myosin V/VI            | 452  | 391 |
| DNA scaffold + 6 myosin VI/V            | 569  | 492 |
| DNA scaffold + 1 myosin V + 1 myosin VI | 828  | 425 |
| DNA scaffold + 2 myosin V + 2 myosin VI | 1837 | 546 |
